# Supplementary material
Source: PubMed Central journal article supplement (PMC8355045)
Supplement: NIHMS1689246-supplement-1.pdf [file NIHMS1689246-supplement-1.pdf]

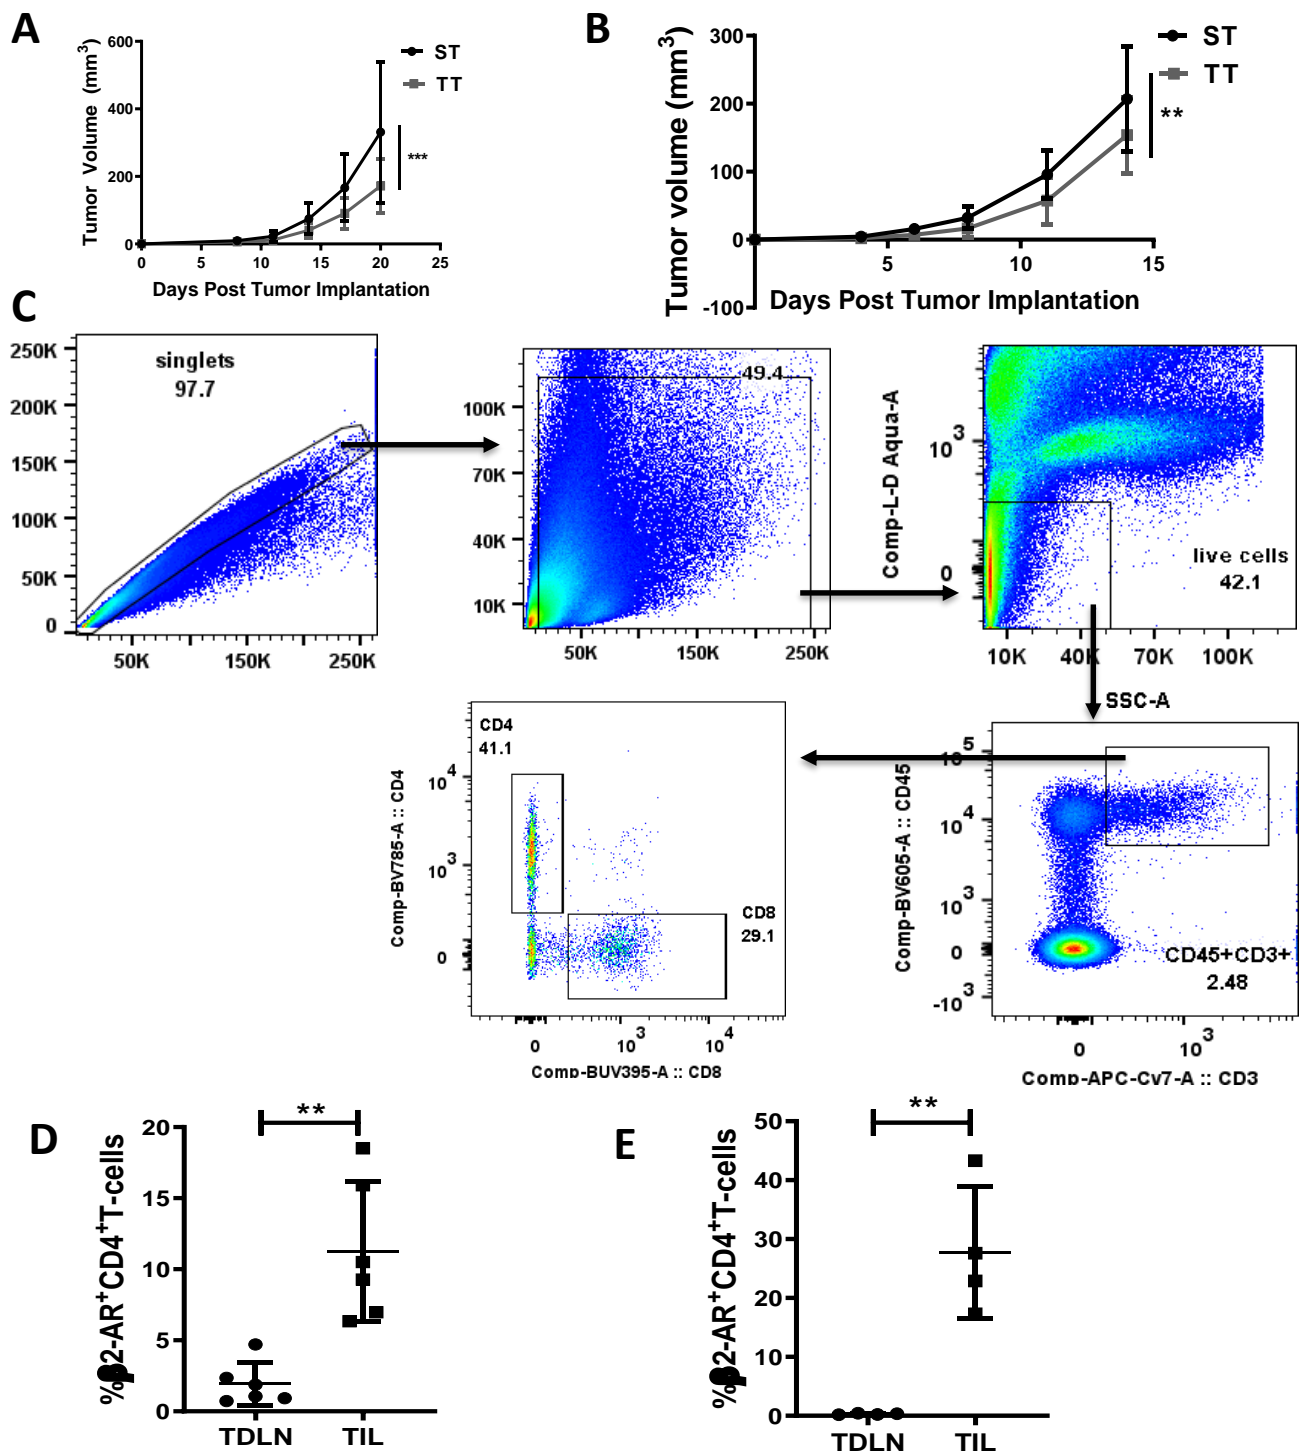

**Supplemental Figure 1: TILs express  $\beta$ 2-AR, and standard housing temperature induced chronic adrenergic stress in mice accelerates tumor growth**

(A-B) Mice were housed at either ST or TT for 3 weeks before tumor implantation.  $2 \times 10^5$  B16-OVA cells (A) or CT26.CL25 (B) were injected into C57BL/6 mice or BALB/c mice, respectively. Tumor growth was monitored every 2-3 days. Data are presented as mean  $\pm$  SD and from one of two independent experiments; Data was analyzed using 2-way ANOVA. (C) TILs were gated by following strategy: singlets > cells > live cells > CD45<sup>+</sup>CD3<sup>+</sup>T-cells > CD4/CD8<sup>+</sup>T-cells (D-E) Frequency of  $\beta$ 2-AR on CD4<sup>+</sup>T-cells from TDLN and TME of untreated WT mice in B16-OVA (D) and CT26 (E) model were tested by flow cytometry; n=4-6/group; Data are presented as mean  $\pm$  SD, and from one of two independent experiments; Data was analyzed using unpaired Student's t-test. \*\*p<0.01, \*\*\*p<0.001

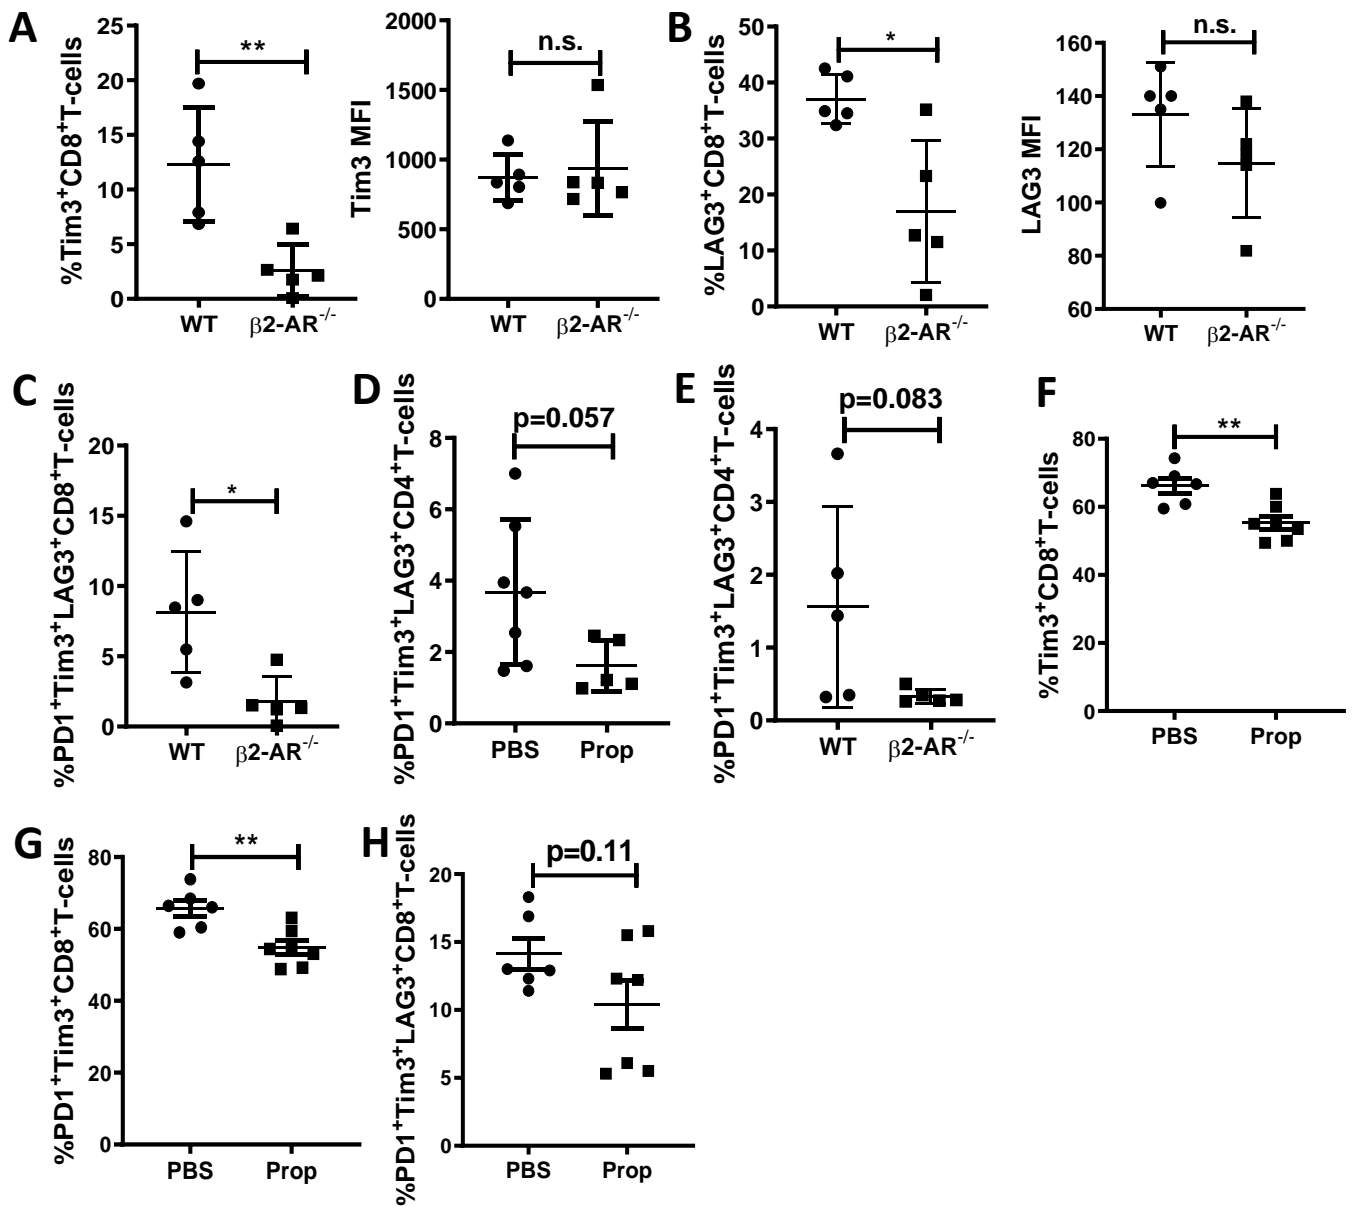

**Supplemental Figure 2: Blockade of adrenergic signaling in stressed mice reduces immune checkpoint receptors expression on TILs**

Single-cell suspensions were made from B16-OVA or CT26 tumors from mice treated with PBS or propranolol or from WT or  $\beta 2\text{-AR}^{-/-}$  mice (A-C & E). (A-B) Frequency and MFI of Tim3<sup>+</sup> (A) and LAG3<sup>+</sup> (B) CD8<sup>+</sup>TILs from B16-OVA tumor. (C) Frequency of PD1<sup>+</sup>Tim3<sup>+</sup>LAG3<sup>+</sup>CD8<sup>+</sup>TILs from B16-OVA tumor. (D-E) Frequency of PD1<sup>+</sup>Tim3<sup>+</sup>LAG3<sup>+</sup>CD4<sup>+</sup>TILs from B16-OVA tumor bearing mice treated with PBS or propranolol (D) or from WT or  $\beta 2\text{-AR}^{-/-}$  mice (E). (F-H) Frequency of Tim3<sup>+</sup> (F), PD1<sup>+</sup>Tim3<sup>+</sup> (G) PD1<sup>+</sup>Tim3<sup>+</sup>LAG3<sup>+</sup> (H) on CD8<sup>+</sup>TILs from CT26 tumor. n=5-7/group; Data are presented as mean  $\pm$  SD, and from one of two independent experiments. Data was analyzed using unpaired Student's t-test, \*p<0.05, \*\*p<0.01

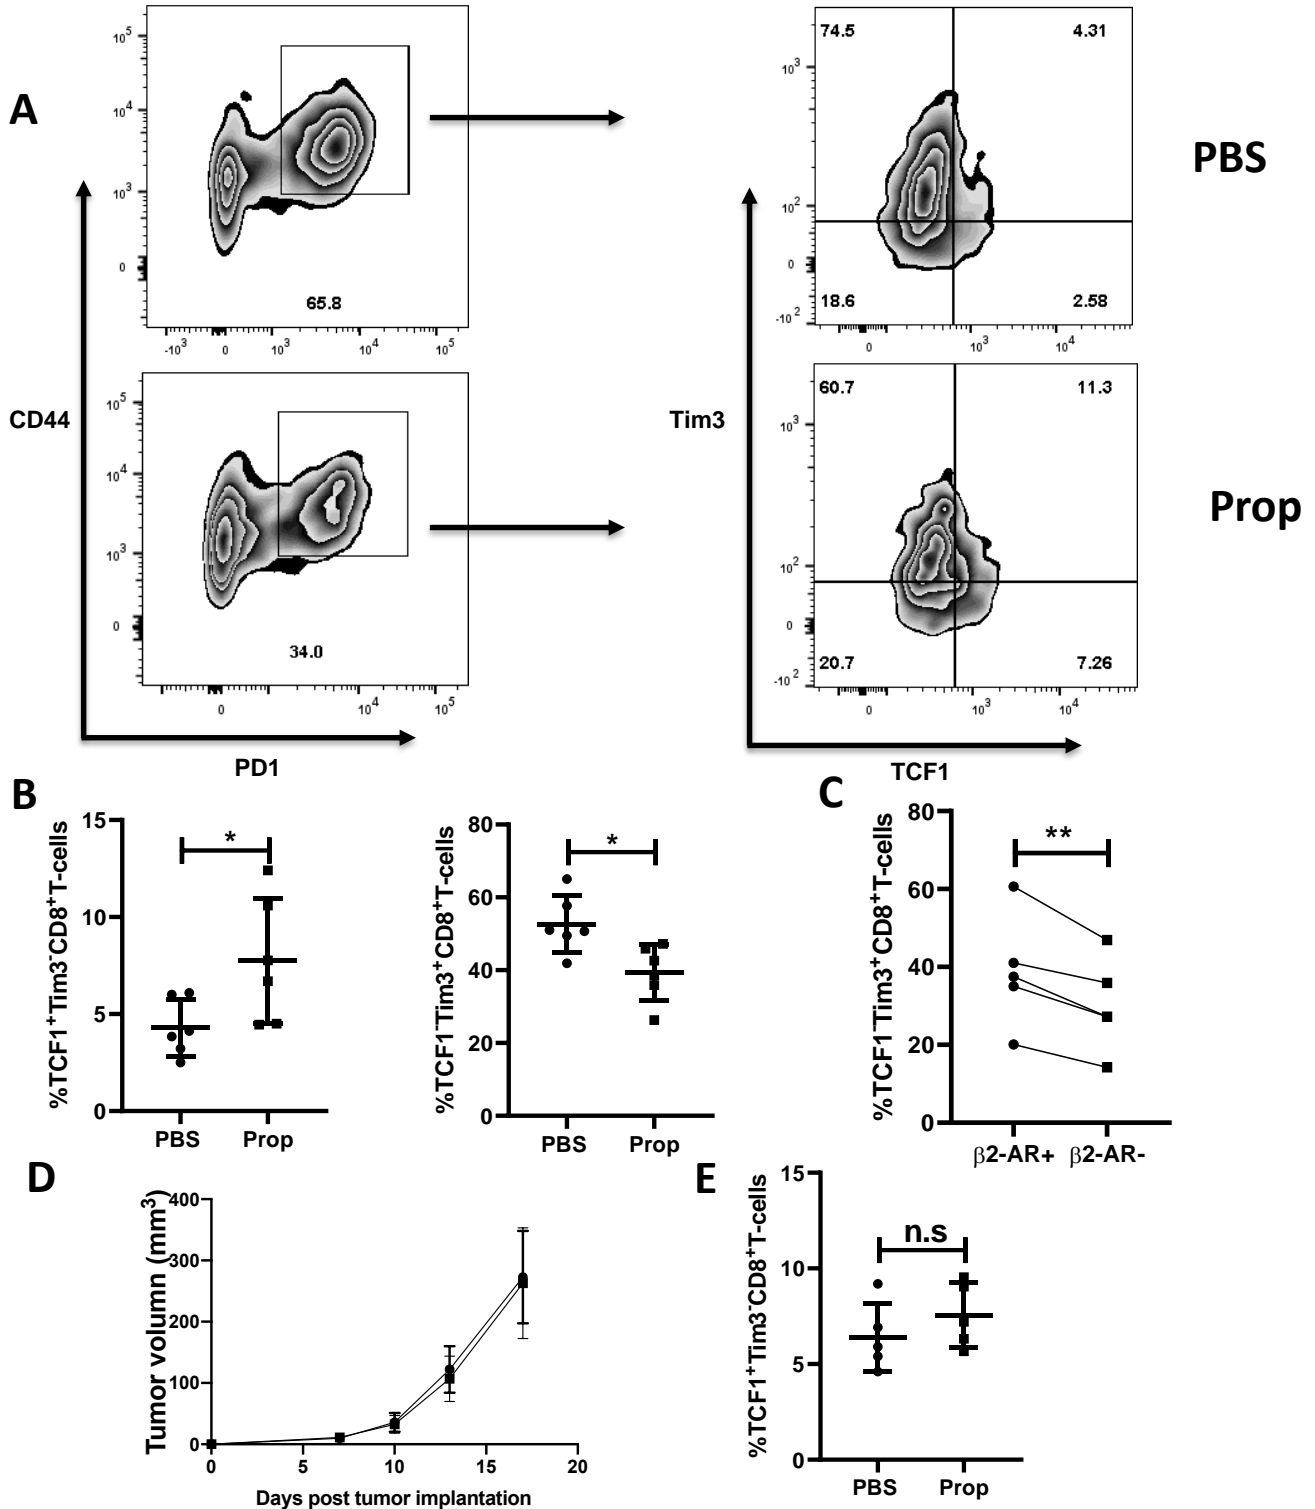

**Supplemental Figure 3: Blockade of adrenergic signaling in stressed mice reduces terminally exhausted CD8<sup>+</sup> TILs**

(A) CD8<sup>+</sup> T-cells were first gated by PD-1<sup>+</sup>CD44<sup>+</sup> then progenitor exhausted T-cells were gated by TCF1<sup>+</sup>Tim3<sup>-</sup>; terminally exhausted T-cells were gated by TCF1<sup>-</sup>Tim3<sup>+</sup> (B) Frequency of progenitor and terminally exhausted CD8<sup>+</sup> TILs from CT26; (C) Frequency of terminally exhausted T-cells in β2-AR<sup>+</sup> and β2-AR<sup>-</sup> CD8<sup>+</sup> TILs; Data was analyzed using paired Student's t-test (D) Tumor growth rate when mice were treated with PBS or propranolol 7 days after tumor implantation; (E) Frequency of progenitor exhausted T-cells in TME from mice treated with PBS or propranolol 7 days after tumor implantation. n=5-6/group; Data are presented as mean ± SD. Data was analyzed using unpaired Student's t-test except (C), \*p<0.05, \*\*p<0.01

**A**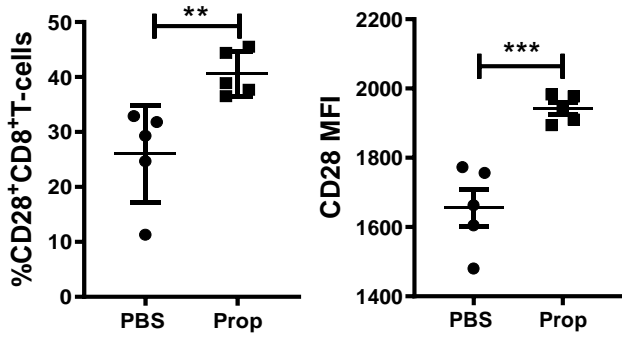**B**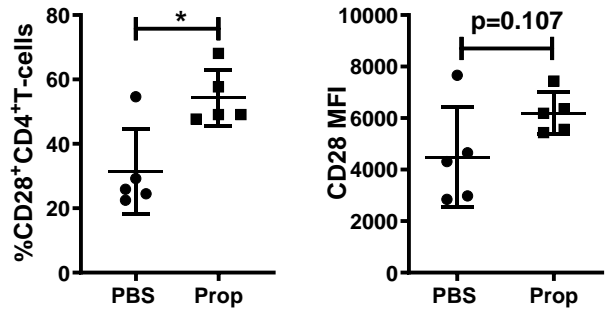

**Supplemental Figure 4: Blockade of adrenergic signaling in stressed mice increases CD28 expression on TILs.**

Single-cell suspensions were made from CT26 tumors from mice treated with PBS or propranolol. (A) Frequency and MFI of CD28 expression on CD8<sup>+</sup>TILs. (B) Frequency and MFI of CD28 expression on CD4<sup>+</sup> TILs.  $n=5$ /group; Data are presented as mean  $\pm$  SD, and from one of two independent experiments; Data was analyzed using unpaired Student's t-test, \* $p<0.05$ .

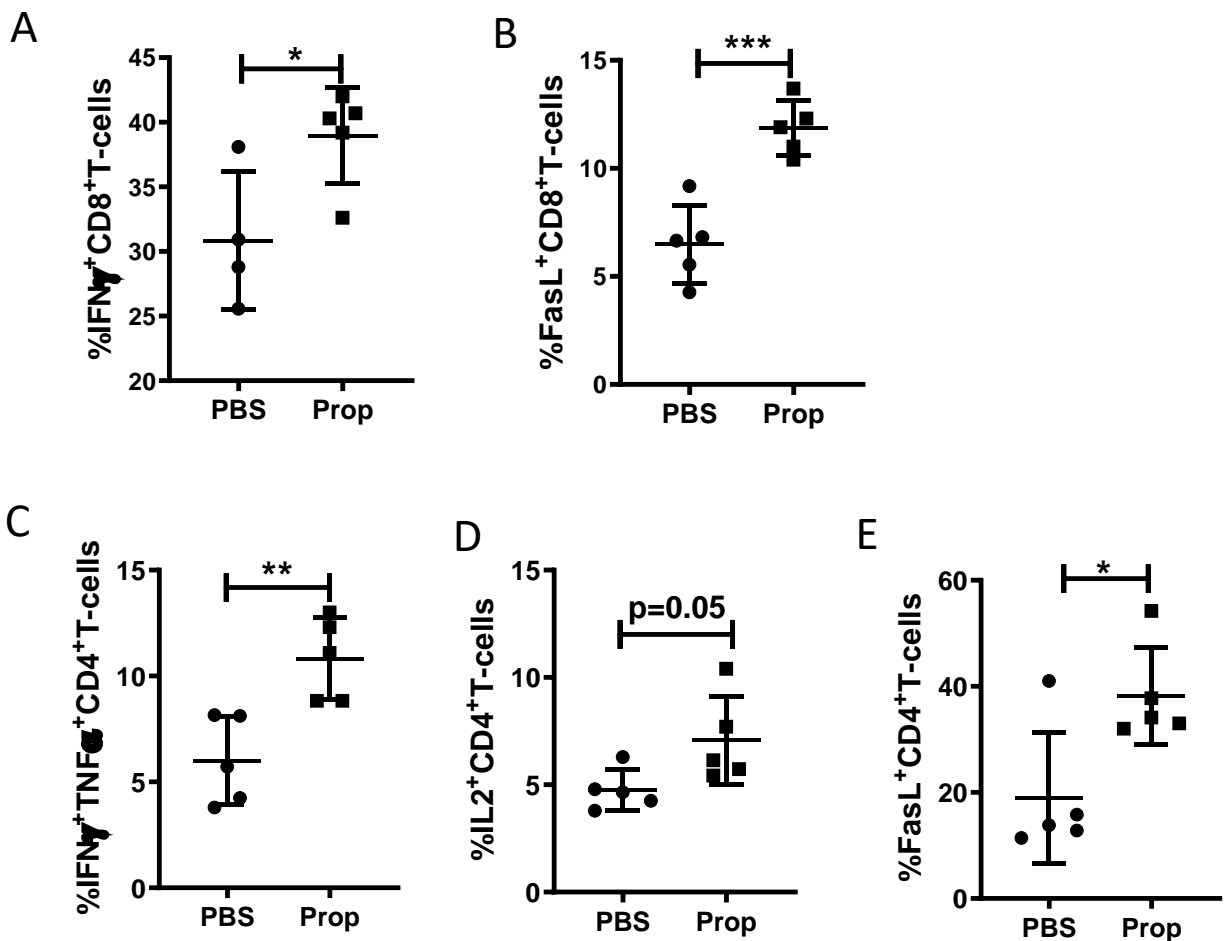

**Supplemental Figure 5: Blocking  $\beta$ -AR signaling in stressed mice increases expression of anti-tumor cytokines and cytotoxic proteins in TILs.**

Single-cell suspensions were made from CT26 tumors from mice treated with PBS or propranolol. (A-B) Frequency of IFN- $\gamma$  (A) and IL2 (B) expression in CD8<sup>+</sup>TILs. (C-E) Frequency of IFN- $\gamma$  (C), IL2 (D) and FasL (E) expression in CD4<sup>+</sup>T-cells from CT26 tumor.  $n = 5$ ; Data are presented as mean  $\pm$  SD, and from one of two independent experiments. Data were analyzed using unpaired Student's  $t$ -test \* $p < 0.05$ , \*\*\* $p < 0.001$

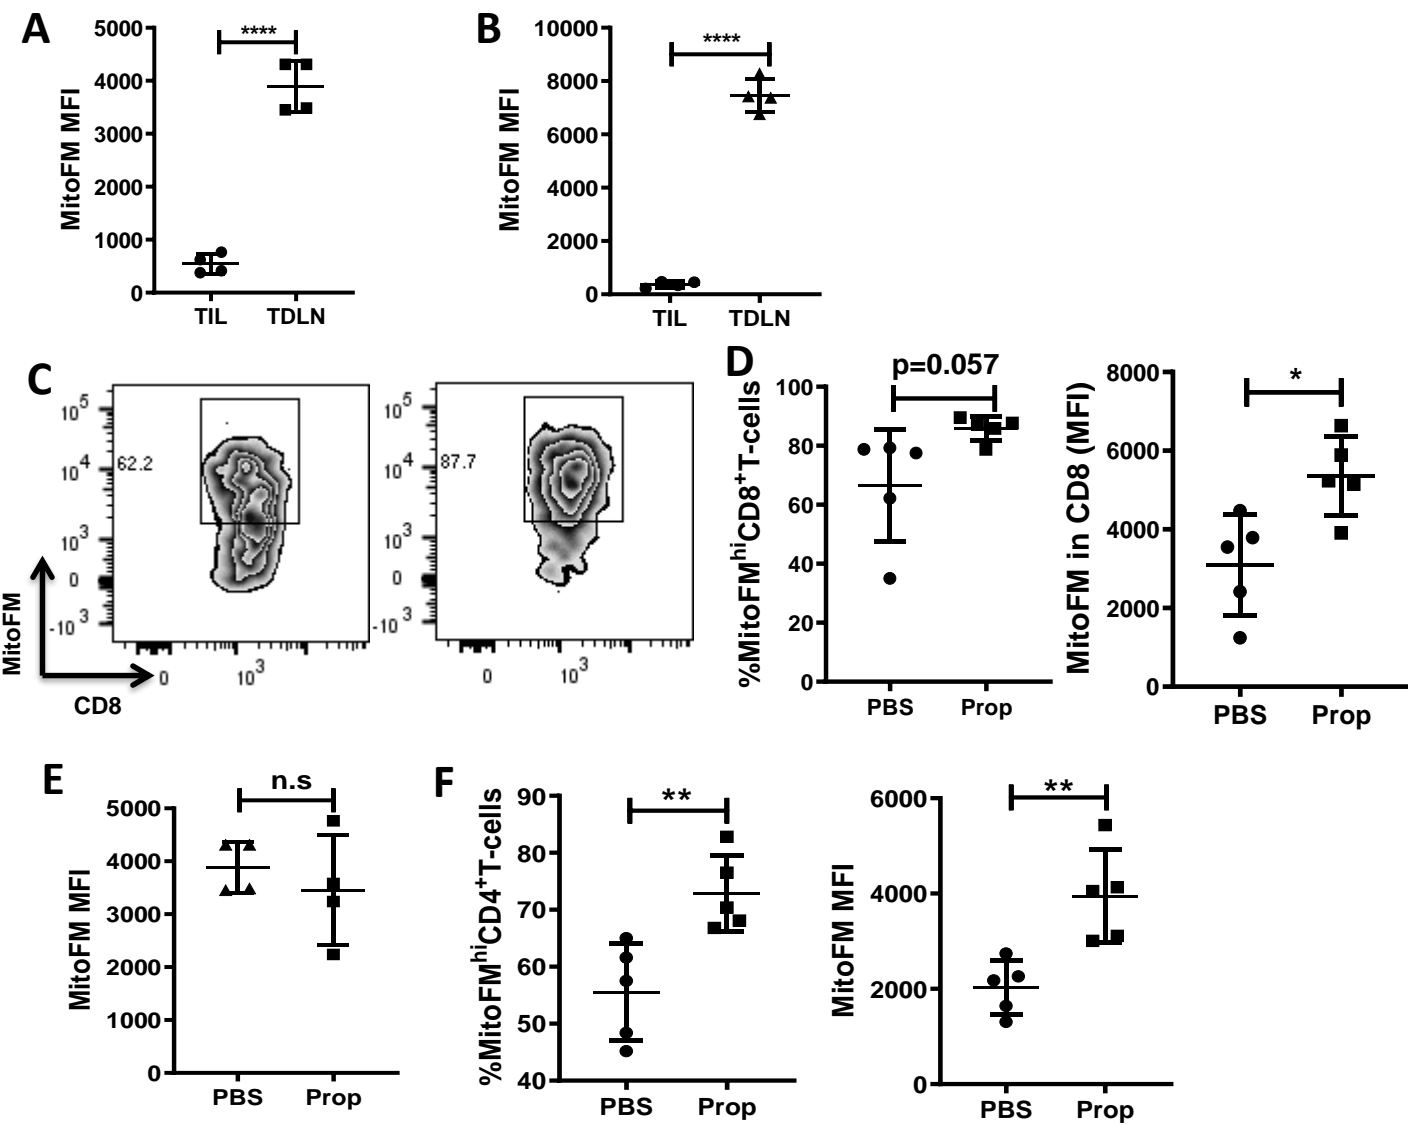

**Supplemental Figure 6: Blocking  $\beta$ -AR signaling in stressed mice alleviates mitochondrial dysfunction of CD8<sup>+</sup>T-cells in the TME**

Single-cell suspensions were made from B16-OVA or CT26 from mice treated with PBS or propranolol. (A) MFI of mitochondrial mass of CD8<sup>+</sup>T-cells from B16-OVA tumor or TDLN. (B) MFI of mitochondrial mass of CD4<sup>+</sup>T-cells from B16-OVA tumor or TDLN. (C) Representative flow plots of mitochondrial mass of CD8<sup>+</sup>TILs from CT26; (D) Frequency and MFI of mitochondrial mass of CD8<sup>+</sup>; (E) MFI of mitochondrial mass of TDLN CD8<sup>+</sup>T-cells from B16-OVA tumor-bearing mice treated with either PBS or propranolol. (F) Frequency and MFI of mitochondrial mass of CD4<sup>+</sup> TILs from CT26.  $n = 4-5/\text{group}$ ; Data are presented as mean  $\pm$  SD, and from one of two independent experiments. Data were analyzed using unpaired Student's  $t$ -test, \* $p < 0.05$ , \*\* $p < 0.01$ , \*\*\*\* $p < 0.0001$

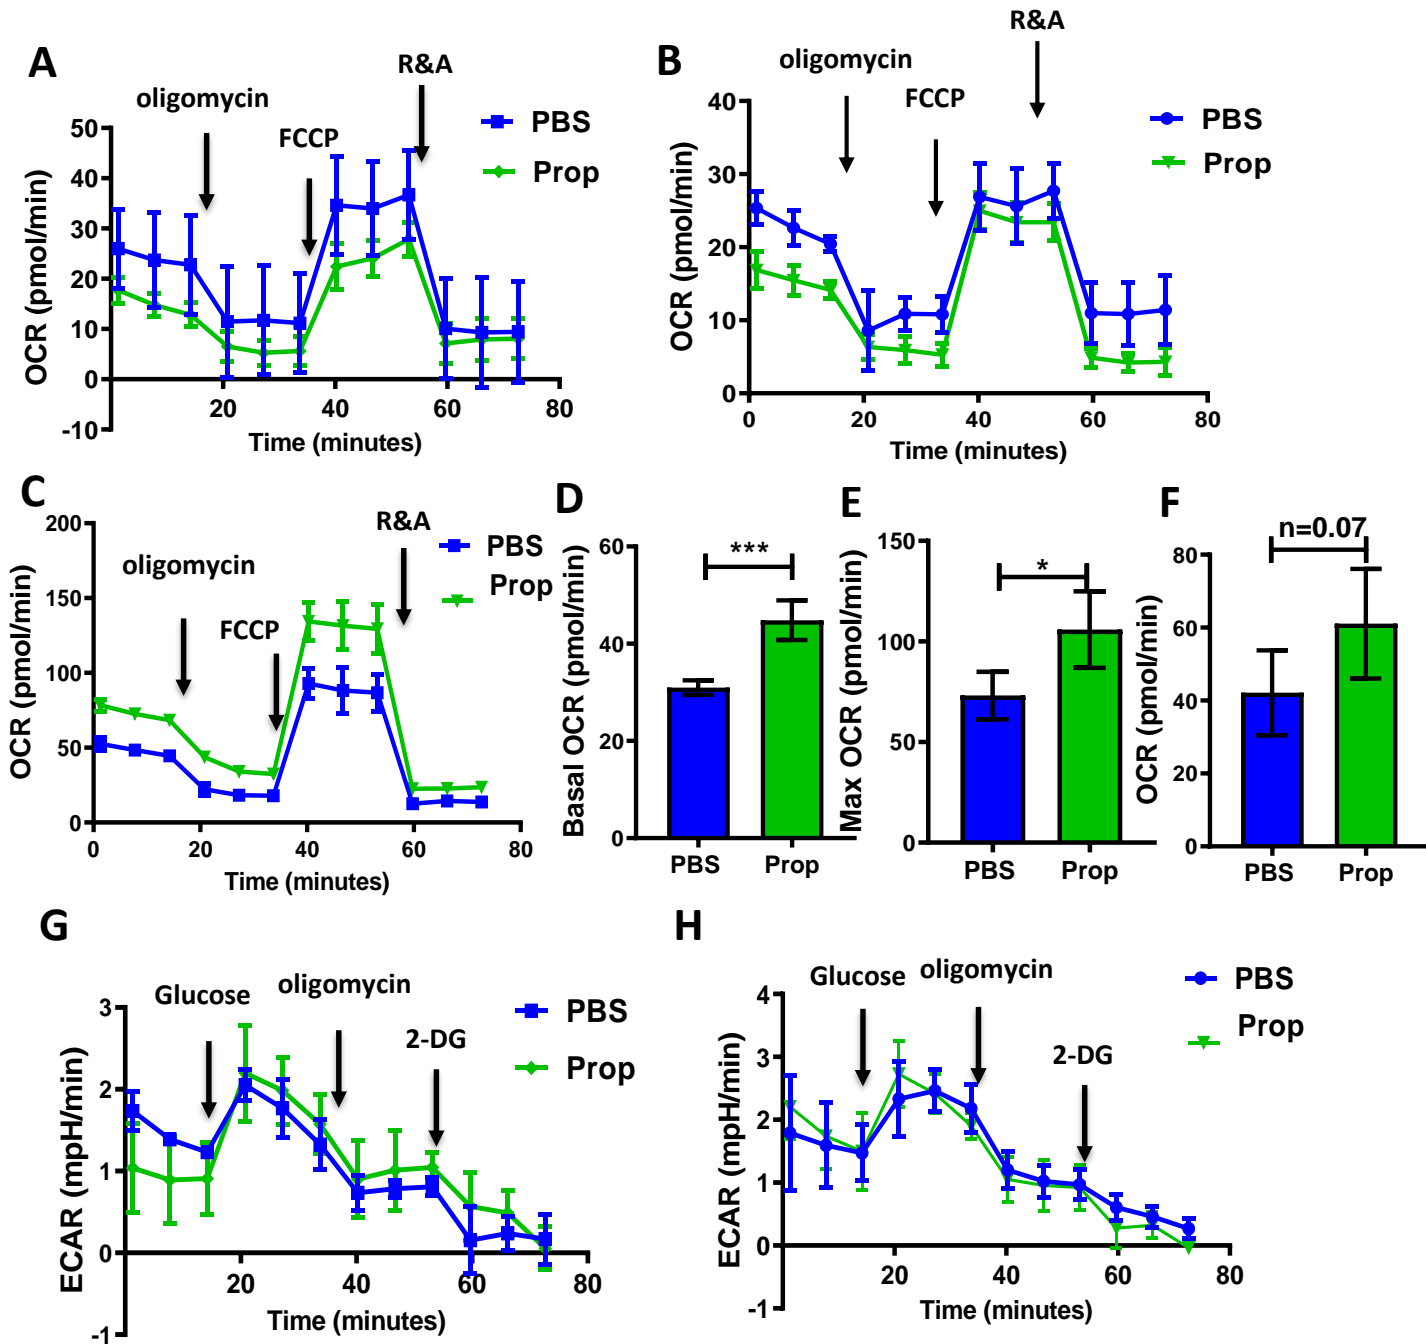

**Supplemental Figure 7: Blocking  $\beta$ -AR signaling does not change metabolism of CD8<sup>+</sup>T-cells from TDLN or spleen**

CD8<sup>+</sup>T-cells of spleen or TDLN or tumor from tumor bearing mice treated with either PBS or propranolol (pooled out from 5 mice/group) were isolated through CD8<sup>+</sup>T-cell isolation kit. OCR or ECAR were measured by adding  $1 \times 10^5$  CD8<sup>+</sup>T-cells to Seahorse Extracellular Flux Analyzer. (A) OCR of CD8<sup>+</sup>T-cells from TDLN; (B) OCR of CD8<sup>+</sup>T-cells from spleen; (C-F) CD8<sup>+</sup>TILs from CT26 (pooled from 5 mice per group) (C) plots of OCR of CD8<sup>+</sup>TILs. (D) Basal OCR of CD8<sup>+</sup>TILs; (E) maximum OCR of CD8<sup>+</sup>TILs; (F) spare respiratory capacity (SRC) of CD8<sup>+</sup>TILs [addition of reagents indicated by arrows: (1) oligomycin; (2) FCCP; and (3) antimycin A and rotenone] (G)

ECAR of CD8<sup>+</sup>T-cells from TDLN. (H) ECAR of CD8<sup>+</sup>T-cells from spleen. [addition of reagents indicated by arrows: (1) glucose; (2) oligomycin; and (3) 2-DG]  $n = 4-5$ ; Data are presented as mean  $\pm$  SD, and from one of two independent experiments; Data was analyzed using Student's t-test.
