# Supplementary material
Source: PubMed Central journal article supplement (PMC8355045)
Supplement: NIHMS1689246-supplement-2.pdf [file NIHMS1689246-supplement-2.pdf]

Supplemental Table 1: List of antibodies and reagents

| <b>Antibodies for Flow Cytometry</b>      |          |                           |                |             |
|-------------------------------------------|----------|---------------------------|----------------|-------------|
| Antigens                                  | Clones   | Manufacturers             | Catalog number | RRID        |
| CD8                                       | 53-6.7   | BD Horizon™               | 563786         | AB_2732919  |
| CD8                                       | 53-6.7   | BD Pharmingen™            | 553035         | AB_398537   |
| CD4                                       | GK1.5    | BD Horizon™               | 563331         | AB_2738140  |
| CD4                                       | GK1.5    | BD Pharmingen™            | 557308         | AB_396634   |
| CD3                                       | 145-2C11 | BD Pharmingen™            | 561042         | AB_2034003  |
| CD45                                      | 30-F11   | BD Horizon™               | 563053         | AB_2737976  |
| CD45                                      | 30-F11   | BD Pharmingen™            | 553080         | AB_394610   |
| LAG3                                      | C9B7W    | BD OptiBuild™             | 740072         | AB_2739842  |
| CD28                                      | 37.51    | BD Pharmingen™            | 562767         | AB_2737780  |
| CD69                                      | H1.2F3   | BD Pharmingen™            | 561931         | AB_10892815 |
| TCF1                                      | S33-966  | BD Pharmingen™            | 564217         | AB_2687845  |
| PD-1                                      | 29F.1A12 | BioLegend™                | 135231         | AB_2566158  |
| Tim3                                      | B8.2C12  | BioLegend™                | 134010         | AB_2632734  |
| IFN- $\gamma$                             | XMG1.2   | BioLegend™                | 505829         | AB_10897937 |
| TNF- $\alpha$                             | MP6-XT22 | BioLegend™                | 506322         | AB_961434   |
| anti-IL2                                  | JES6-5H4 | BioLegend™                | 503837         | AB_2564225  |
| FasL                                      | MFL3     | Invitrogen™               | 25-5911-82     | AB_2573497  |
| $\beta$ 2-AR                              |          | Biorbyt                   | orb15065       | AB_10735676 |
| GLUT-1                                    | EPR3915  | Abcam™                    | ab195020       | AB_2783877  |
| <b>Isotype Control for Flow Cytometry</b> |          |                           |                |             |
| BV421 Rat IgG1, $\kappa$ Isotype          | RTK2071  | BioLegend™                | 400429         | AB_10900998 |
| PerCP-Cy5.5 Rat IgG1, $\kappa$ Isotype    | RTK2071  | BioLegend™                | 400425         | AB_893689   |
| BV711 Rat IgG2b, $\kappa$ Isotype         | RTK4530  | BioLegend™                | 400653         |             |
| PE Mouse IgG1, $\kappa$ Isotype           | MOPC-21  | BD Pharmingen™            | 554680         | AB_395506   |
| Recombinant Alexa Fluor 647 Rabbit IgG    | EPR25A   | Abcam™                    | ab199093       | AB_2818935  |
| <b>Antibodies for Western Blot</b>        |          |                           |                |             |
| phospho-Zap-70 (Tyr 319)/Syk (Tyr352)     | 65E4     | Cell Signaling Technology | 2717S          | AB_2218658  |
| Zap-70                                    | D1C10E   | Cell Signaling Technology | 3165S          | AB_2218656  |

| GAPDH                                                        | D4C6R           | Cell Signaling Technology | 97166S                     | AB_2756824                          |
|--------------------------------------------------------------|-----------------|---------------------------|----------------------------|-------------------------------------|
| Anti-rabbit IgG, HRP-linked                                  |                 | Cell Signaling Technology | 7074                       | AB_2099233                          |
| Anti-mouse IgG, HRP-linked                                   |                 | Cell Signaling Technology | 7076                       | AB_330924                           |
| <b>Antibodies for Cell Culture</b>                           |                 |                           |                            |                                     |
| Anti-CD3                                                     | 145-2C11        | BioXcell                  | BE0001-1                   | AB_1107634                          |
| Anti-CD28                                                    | 37.51           | BioXcell                  | BE0015-1                   | AB_1107624                          |
| <b>Reagents for Metabolic Analysis</b>                       |                 |                           |                            |                                     |
| <b>Name</b>                                                  | <b>Provider</b> | <b>Cat#</b>               | <b>Final concentration</b> | <b>Injection Time</b>               |
| Oligomycin                                                   | Sigma           | 45-75351-5MG              | 1 $\mu$ M                  | 16mins for OCR/<br>35 mins for ECAR |
| FCCP (carbonyl cyanide 4-(trifluoromethoxy) phenylhydrazone) | Sigma           | C2920-10MG                | 2 $\mu$ M                  | 35mins                              |
| Antimycin A                                                  | Sigma           | A8674-25MG                | 0.5 $\mu$ M                | 55mins                              |
| Rotenone                                                     | Sigma           | 45656-250MG               |                            |                                     |
| Glucose                                                      | Thermo          | 15023-021                 | 10mM                       | 16mins                              |
| 2-DG (2-deoxy-D-glucose)                                     | Sigma           | D6134-25G                 | 50mM                       | 55mins                              |
